# Supplementary material for: An NIR light-driven AgBiS2@ZIF-8 hybrid photocatalyst for rapid bacteria-killing
Source: Royal Society of Chemistry journal article supplement (doi:10.1039/d3tb02285d), 2024-01-01
Supplement: d3tb02285d1.pdf [file d3tb02285d1.pdf]

## Supplementary Material

### **NIR Light-Driven AgBiS<sub>2</sub>@ZIF-8 Hybrid Photocatalysts for Rapid Bacteria-Killing**

Ting Liu<sup>1</sup>, Kangkang Huang<sup>1</sup>, Yuxia Yang<sup>1</sup>, Shengwu Wen<sup>1</sup>, Jingxian Zhang<sup>1</sup>,  
Suiping Deng<sup>1</sup>, Shaozao Tan<sup>1,2,\*</sup>, Langhuan Huang<sup>1,2,\*</sup>

Guangdong Engineering & Technology Research Centre of Graphene-like Materials  
and Products, Department of Chemistry, College of Chemistry and Materials Science,  
Jinan University, Guangzhou 510632, China

It could be seen from Fig. S1 that the water contact angle of the polished Ti plates was 112.86 °. The surface of Ti formed a slight network structure after alkali treatment, which improved the hydrophilicity of the Ti plates (90.7 °). The network structure was conducive to the coating of AgBiS<sub>2</sub> precursor. The water contact angle (137.4 °) of AgBiS<sub>2</sub>/Ti was much higher than that of Ti-OH, which might be caused by the lotus leaf effect of nanorods<sup>1, 2</sup>. It was worth noting that after loading ZIF-8, the hydrophilicity of the material was significantly improved (50.8 °), and the improvement of wettability was good for tissue adhesion.

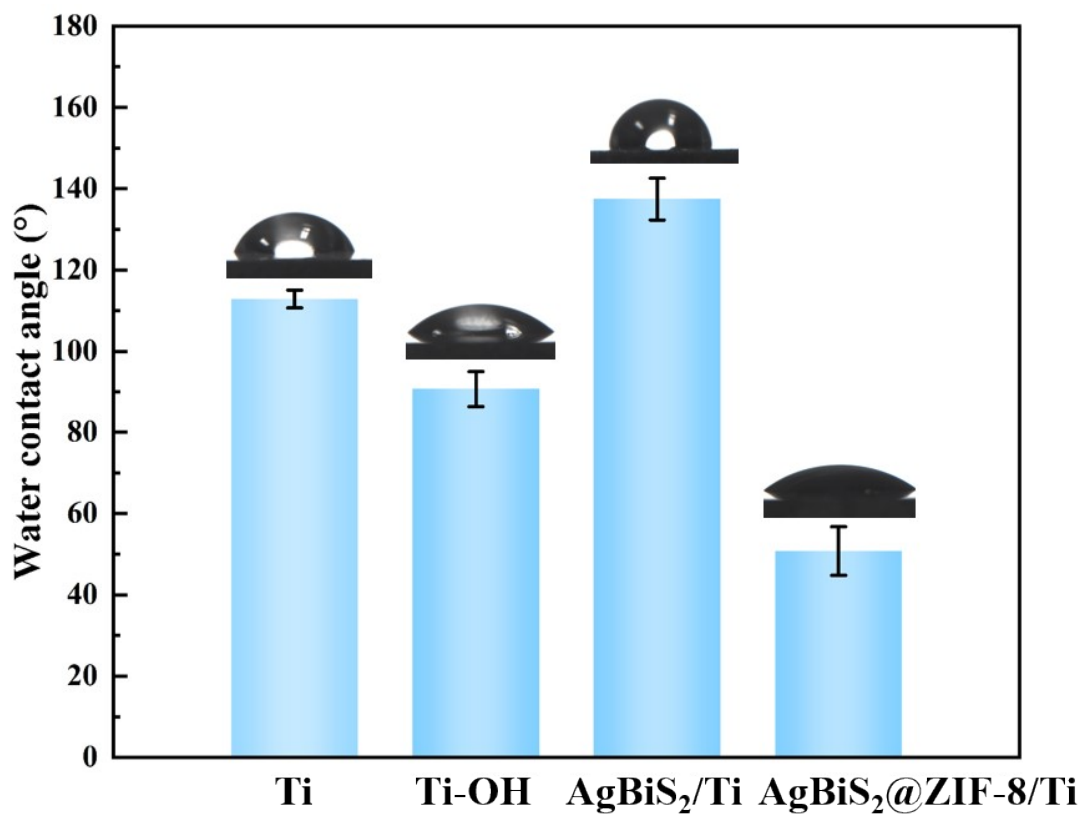

**Fig. S1.** Water contact angles of Ti, Ti-OH, AgBiS<sub>2</sub>/Ti and AgBiS<sub>2</sub>@ZIF-8/Ti.

Fig. S2 showed the UV-visible absorption spectra of all the as-prepared samples. From Fig. S2, it could be observed that ZIF-8 showed strong absorption at about 260 nm, which was attributed to the characteristic absorption peak of ZIF-8. ZIF-8 had the band gap at 5.07 eV.

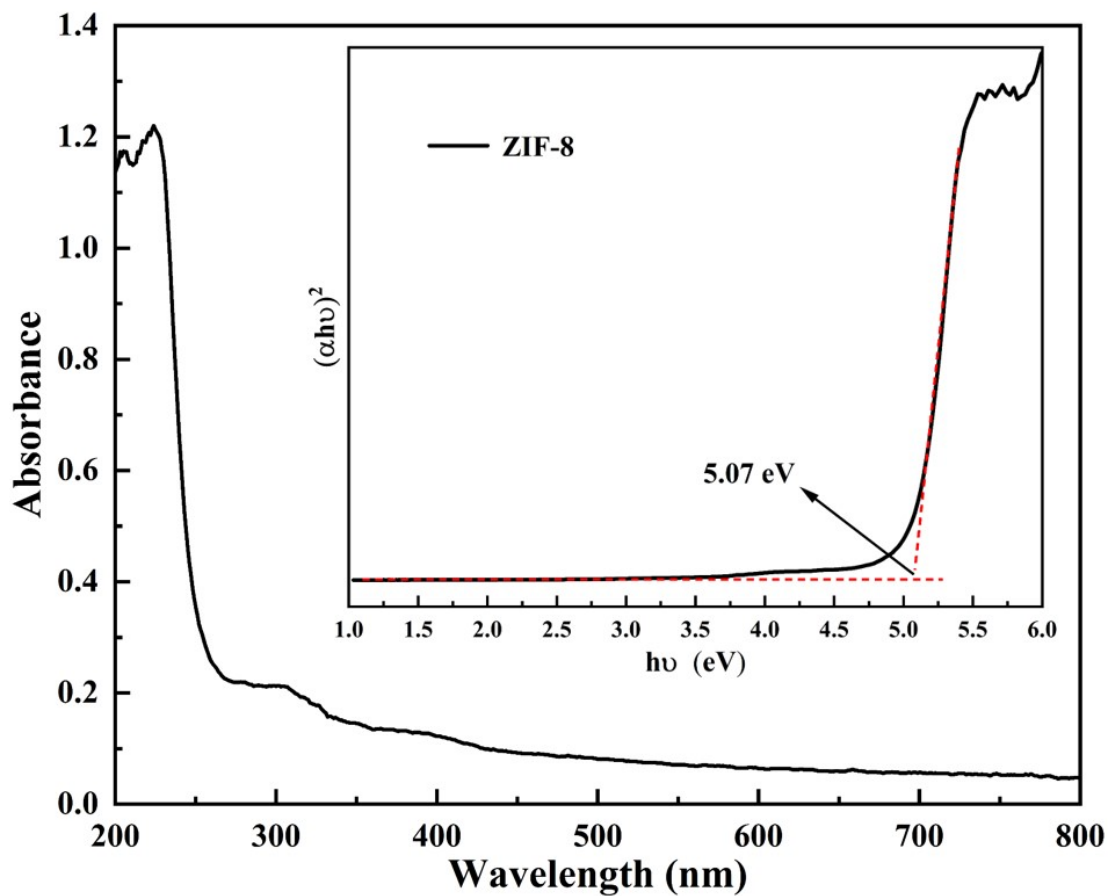

Fig. S2. UV-Vis DRS spectra and Tauc plots of ZIF-8.

The surface properties, area and texture of biomaterials could affect their blood compatibility. Through a simple hemolysis test in vitro, we could judge quickly whether the biomaterials were suitable for clinical treatment. Hemolytic analysis was conducted to analyze the association between Ti plates and RBCs. Our data showed excellent blood compatibility potential of Ti plates (Fig. S3). All samples exhibited slight hemolysis (<5%), which was lower than the critical safe range for biomaterial-induced hemolysis, according to ISO/TR 7406<sup>3</sup>.

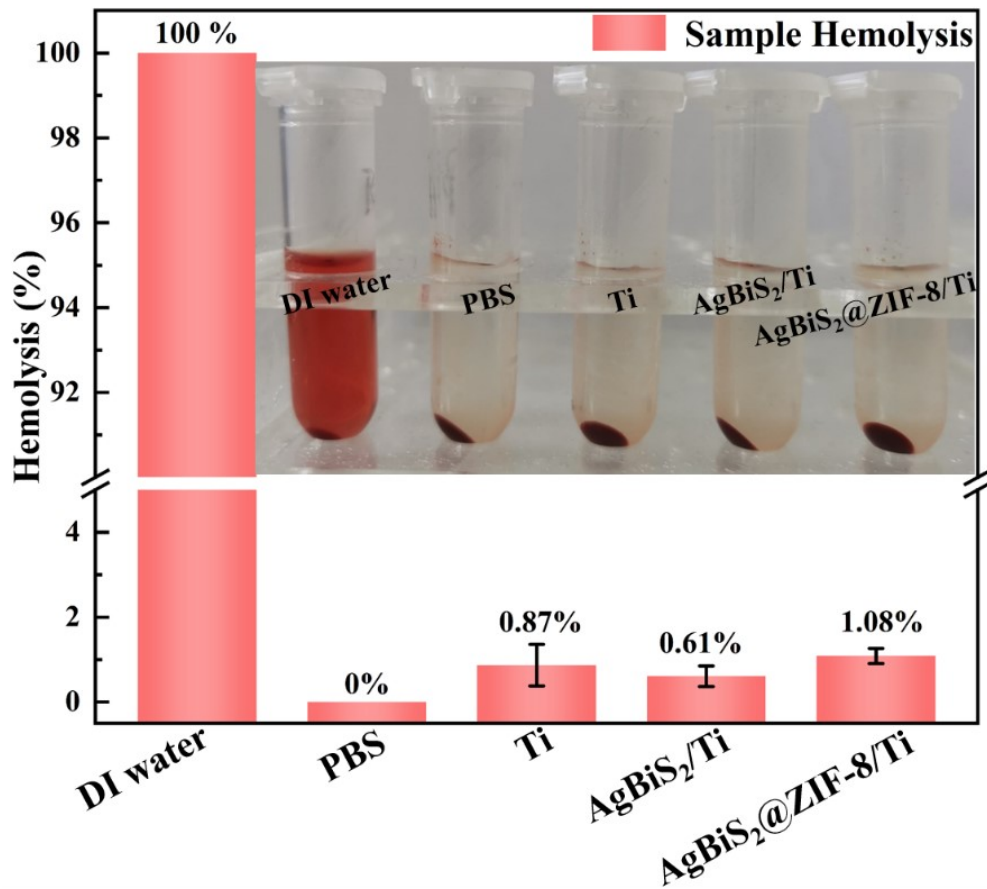

Fig. S3. Hemolysis rates of different samples components for rabbit red blood cells.

## References

1. S. Akhil and R. G. Balakrishna, *Journal of Materials Chemistry A*, 2022, **10**, 8615-8625.
2. M. Ghasemlou, P. H. Le, F. Daver, B. J. Murdoch, E. P. Ivanova and B. Adhikari, *ACS Applied Materials & Interfaces*, 2021, **13**, 36558-36573.
3. Y. Wang, Y. Wu, L. Long, L. Yang, D. Fu, C. Hu, Q. Kong and Y. Wang, *ACS Applied Materials & Interfaces*, 2021, **13**, 33584-33599.
